# Supplementary material
Source: publisher figshare collection journal article supplement (https://acs.figshare.com/ndownloader/files/26491613)
Supplement: Supplementary file 1 [file 26491613]

Compound	SMILES	ROR?t GAL4 EC50 (nM)	IL-17 hWB EC50 (nM)	Metabolic Stability %rem (h/m/r)
3a	[H][C@]12[C@](CC[C@H]2N([H])C(C)=O)(S(C3=CC=C(F)C=C3)(=O)=O)C4=CC=C(C(F)(C(F)(F)F)C(F)(F)F)C=C4CC1	5.4	120 ± 16	ND/90/100
3b	[H][C@]12[C@](CC[C@H]2N([H])C(CO)=O)(S(C3=CC=C(F)C=C3)(=O)=O)C4=CC=C(C(F)(C(F)(F)F)C(F)(F)F)C=C4CC1	8.5	116 ± 21	82/65/34
3c	[H][C@]12[C@](CC[C@H]2N([H])C([C@@H](C)O)=O)(S(C3=CC=C(F)C=C3)(=O)=O)C4=CC=C(C(F)(C(F)(F)F)C(F)(F)F)C=C4CC1	8.6	64 ± 32	71/70/14
3d	[H][C@]12[C@](CC[C@H]2N([H])C(C(C)(C)O)=O)(S(C3=CC=C(F)C=C3)(=O)=O)C4=CC=C(C(F)(C(F)(F)F)C(F)(F)F)C=C4CC1	3.6	50 ± 13	100/92/100
3e	[H][C@]12[C@](CC[C@H]2N([H])C(CC(C)(C)O)=O)(S(C3=CC=C(F)C=C3)(=O)=O)C4=CC=C(C(F)(C(F)(F)F)C(F)(F)F)C=C4CC1	2.5	54 ± 20	97/86/90
3f	[H][C@]12[C@](CC[C@H]2N([H])C(C3(O)CCCCC3)=O)(S(C4=CC=C(F)C=C4)(=O)=O)C5=CC=C(C(F)(C(F)(F)F)C(F)(F)F)C=C5CC1	1.4	67 ± 31	50/56/22
3g	[H][C@]12[C@](CC[C@H]2N([H])C(C3(O)CCOCC3)=O)(S(C4=CC=C(F)C=C4)(=O)=O)C5=CC=C(C(F)(C(F)(F)F)C(F)(F)F)C=C5CC1	7.4	21 ± 5	100/75/66
4a	[H][C@]12[C@](CC[C@H]2N([H])C(C(C)(C)N)=O)(S(C3=CC=C(F)C=C3)(=O)=O)C4=CC=C(C(F)(C(F)(F)F)C(F)(F)F)C=C4CC1	30	164 ± 11	80/100/100
4b	[H][C@]12[C@](CC[C@H]2N([H])C(CC(C)(C)N)=O)(S(C3=CC=C(F)C=C3)(=O)=O)C4=CC=C(C(F)(C(F)(F)F)C(F)(F)F)C=C4CC1	48	981 ± 223	98/85/89
4c	[H][C@]12[C@](CC[C@H]2N([H])C(C3(O)CCNCC3)=O)(S(C4=CC=C(F)C=C4)(=O)=O)C5=CC=C(C(F)(C(F)(F)F)C(F)(F)F)C=C5CC1	26	1940	100/88/83
4d	[H][C@]12[C@](CC[C@H]2N([H])C(C(N3CCNCC3)(C)C)=O)(S(C4=CC=C(F)C=C4)(=O)=O)C5=CC=C(C(F)(C(F)(F)F)C(F)(F)F)C=C5CC1	63	ND	74/78/97
4e	[H][C@]12[C@](CC[C@H]2N([H])C(C(N3CCOCC3)(C)C)=O)(S(C4=CC=C(F)C=C4)(=O)=O)C5=CC=C(C(F)(C(F)(F)F)C(F)(F)F)C=C5CC1	2.2	39 ± 5	0.3/0.3/0.4
5a	[H][C@]12[C@](CC[C@H]2N([H])C(CNC(C)=O)=O)(S(C3=CC=C(F)C=C3)(=O)=O)C4=CC=C(C(F)(C(F)(F)F)C(F)(F)F)C=C4CC1	4.5	95 ± 63	100/93/10
5b	[H][C@]12[C@](CC[C@H]2N([H])C(C3CCN(C(C)=O)CC3)=O)(S(C4=CC=C(F)C=C4)(=O)=O)C5=CC=C(C(F)(C(F)(F)F)C(F)(F)F)C=C5CC1	15	34 ± 10	61/67/100
5c	[H][C@]12[C@](CC[C@H]2N([H])C([C@@H]3CCC(N3CCC#N)=O)=O)(S(C4=CC=C(F)C=C4)(=O)=O)C5=CC=C(C(F)(C(F)(F)F)C(F)(F)F)C=C5CC1	20	96 ± 29	ND/71/99
5d	[H][C@]12[C@](CC[C@H]2N([H])C([C@@H]3C[C@@H](F)C(N3C([2H])([2H])[2H])=O)=O)(S(C4=CC=C(F)C=C4)(=O)=O)C5=CC=C(C(F)(C(F)(F)F)C(F)(F)F)C=C5CC1	5.4	48 ± 29	100/86/100
5e	[H][C@]12[C@](CC[C@H]2N([H])C([C@@H]3C[C@@H](O)C(N3C([2H])([2H])[2H])=O)=O)(S(C4=CC=C(F)C=C4)(=O)=O)C5=CC=C(C(F)(C(F)(F)F)C(F)(F)F)C=C5CC1	12.3	134 ± 22	99/100/100
6a	[H][C@]12[C@](CC[C@H]2N([H])S(C)(=O)=O)(S(C3=CC=C(F)C=C3)(=O)=O)C4=CC=C(C(F)(C(F)(F)F)C(F)(F)F)C=C4CC1	7.3	157 ± 48	ND
6b	[H][C@]12[C@](CC[C@H]2N([H])C(CS(N)(=O)=O)=O)(S(C3=CC=C(F)C=C3)(=O)=O)C4=CC=C(C(F)(C(F)(F)F)C(F)(F)F)C=C4CC1	9.9	127 ± 36	ND
6c	[H][C@]12[C@](CC[C@H]2N([H])C(C3(O)CCN(S(=O)(C)=O)CC3)=O)(S(C4=CC=C(F)C=C4)(=O)=O)C5=CC=C(C(F)(C(F)(F)F)C(F)(F)F)C=C5CC1	6.7	28 ± 13	97/100/100
6d	[H][C@]12[C@](CC[C@H]2N([H])C(C3CCS(CC3)(=O)=O)=O)(S(C4=CC=C(F)C=C4)(=O)=O)C5=CC=C(C(F)(C(F)(F)F)C(F)(F)F)C=C5CC1	8.7	50 ± 24	100/95/100
6e	[H][C@]12[C@](CC[C@H]2N([H])C(C3(O)CCS(CC3)(=O)=O)=O)(S(C4=CC=C(F)C=C4)(=O)=O)C5=CC=C(C(F)(C(F)(F)F)C(F)(F)F)C=C5CC1	1.9	36 ± 17	97/99/97
6f	[H][C@]12[C@](CC[C@H]2N([H])C([C@@H]3CC[C@@H](C(O)=O)CC3)=O)(S(C4=CC=C(F)C=C4)(=O)=O)C5=CC=C(C(F)(C(F)(F)F)C(F)(F)F)C=C5CC1	24	291	100/100/100
7a	[H][C@]12[C@](CC[C@H]2N([H])C(NC)=O)(S(C3=CC=C(F)C=C3)(=O)=O)C4=CC=C(C(F)(C(F)(F)F)C(F)(F)F)C=C4CC1	3.7	101 ± 67	40/32/10
7b	[H][C@]12[C@](CC[C@H]2N([H])C(NCCO)=O)(S(C3=CC=C(F)C=C3)(=O)=O)C4=CC=C(C(F)(C(F)(F)F)C(F)(F)F)C=C4CC1	2.5	65 ± 28	97/93/41
7c	[H][C@]12[C@](CC[C@H]2N([H])C(NCC(C)(C)O)=O)(S(C3=CC=C(F)C=C3)(=O)=O)C4=CC=C(C(F)(C(F)(F)F)C(F)(F)F)C=C4CC1	3.1	32 ± 2	54/ND/42
7d	[H][C@]12[C@](CC[C@H]2N([H])C(OCC(C)(C)O)=O)(S(C3=CC=C(F)C=C3)(=O)=O)C4=CC=C(C(F)(C(F)(F)F)C(F)(F)F)C=C4CC1	9.1	91 ± 8	ND
